# Supplementary material
Source: PubMed Central journal article supplement (PMC5687085)
Supplement: NIHMS917492-supplement-supplement_1.pdf [file NIHMS917492-supplement-supplement_1.pdf]

# Supplemental Figure 1

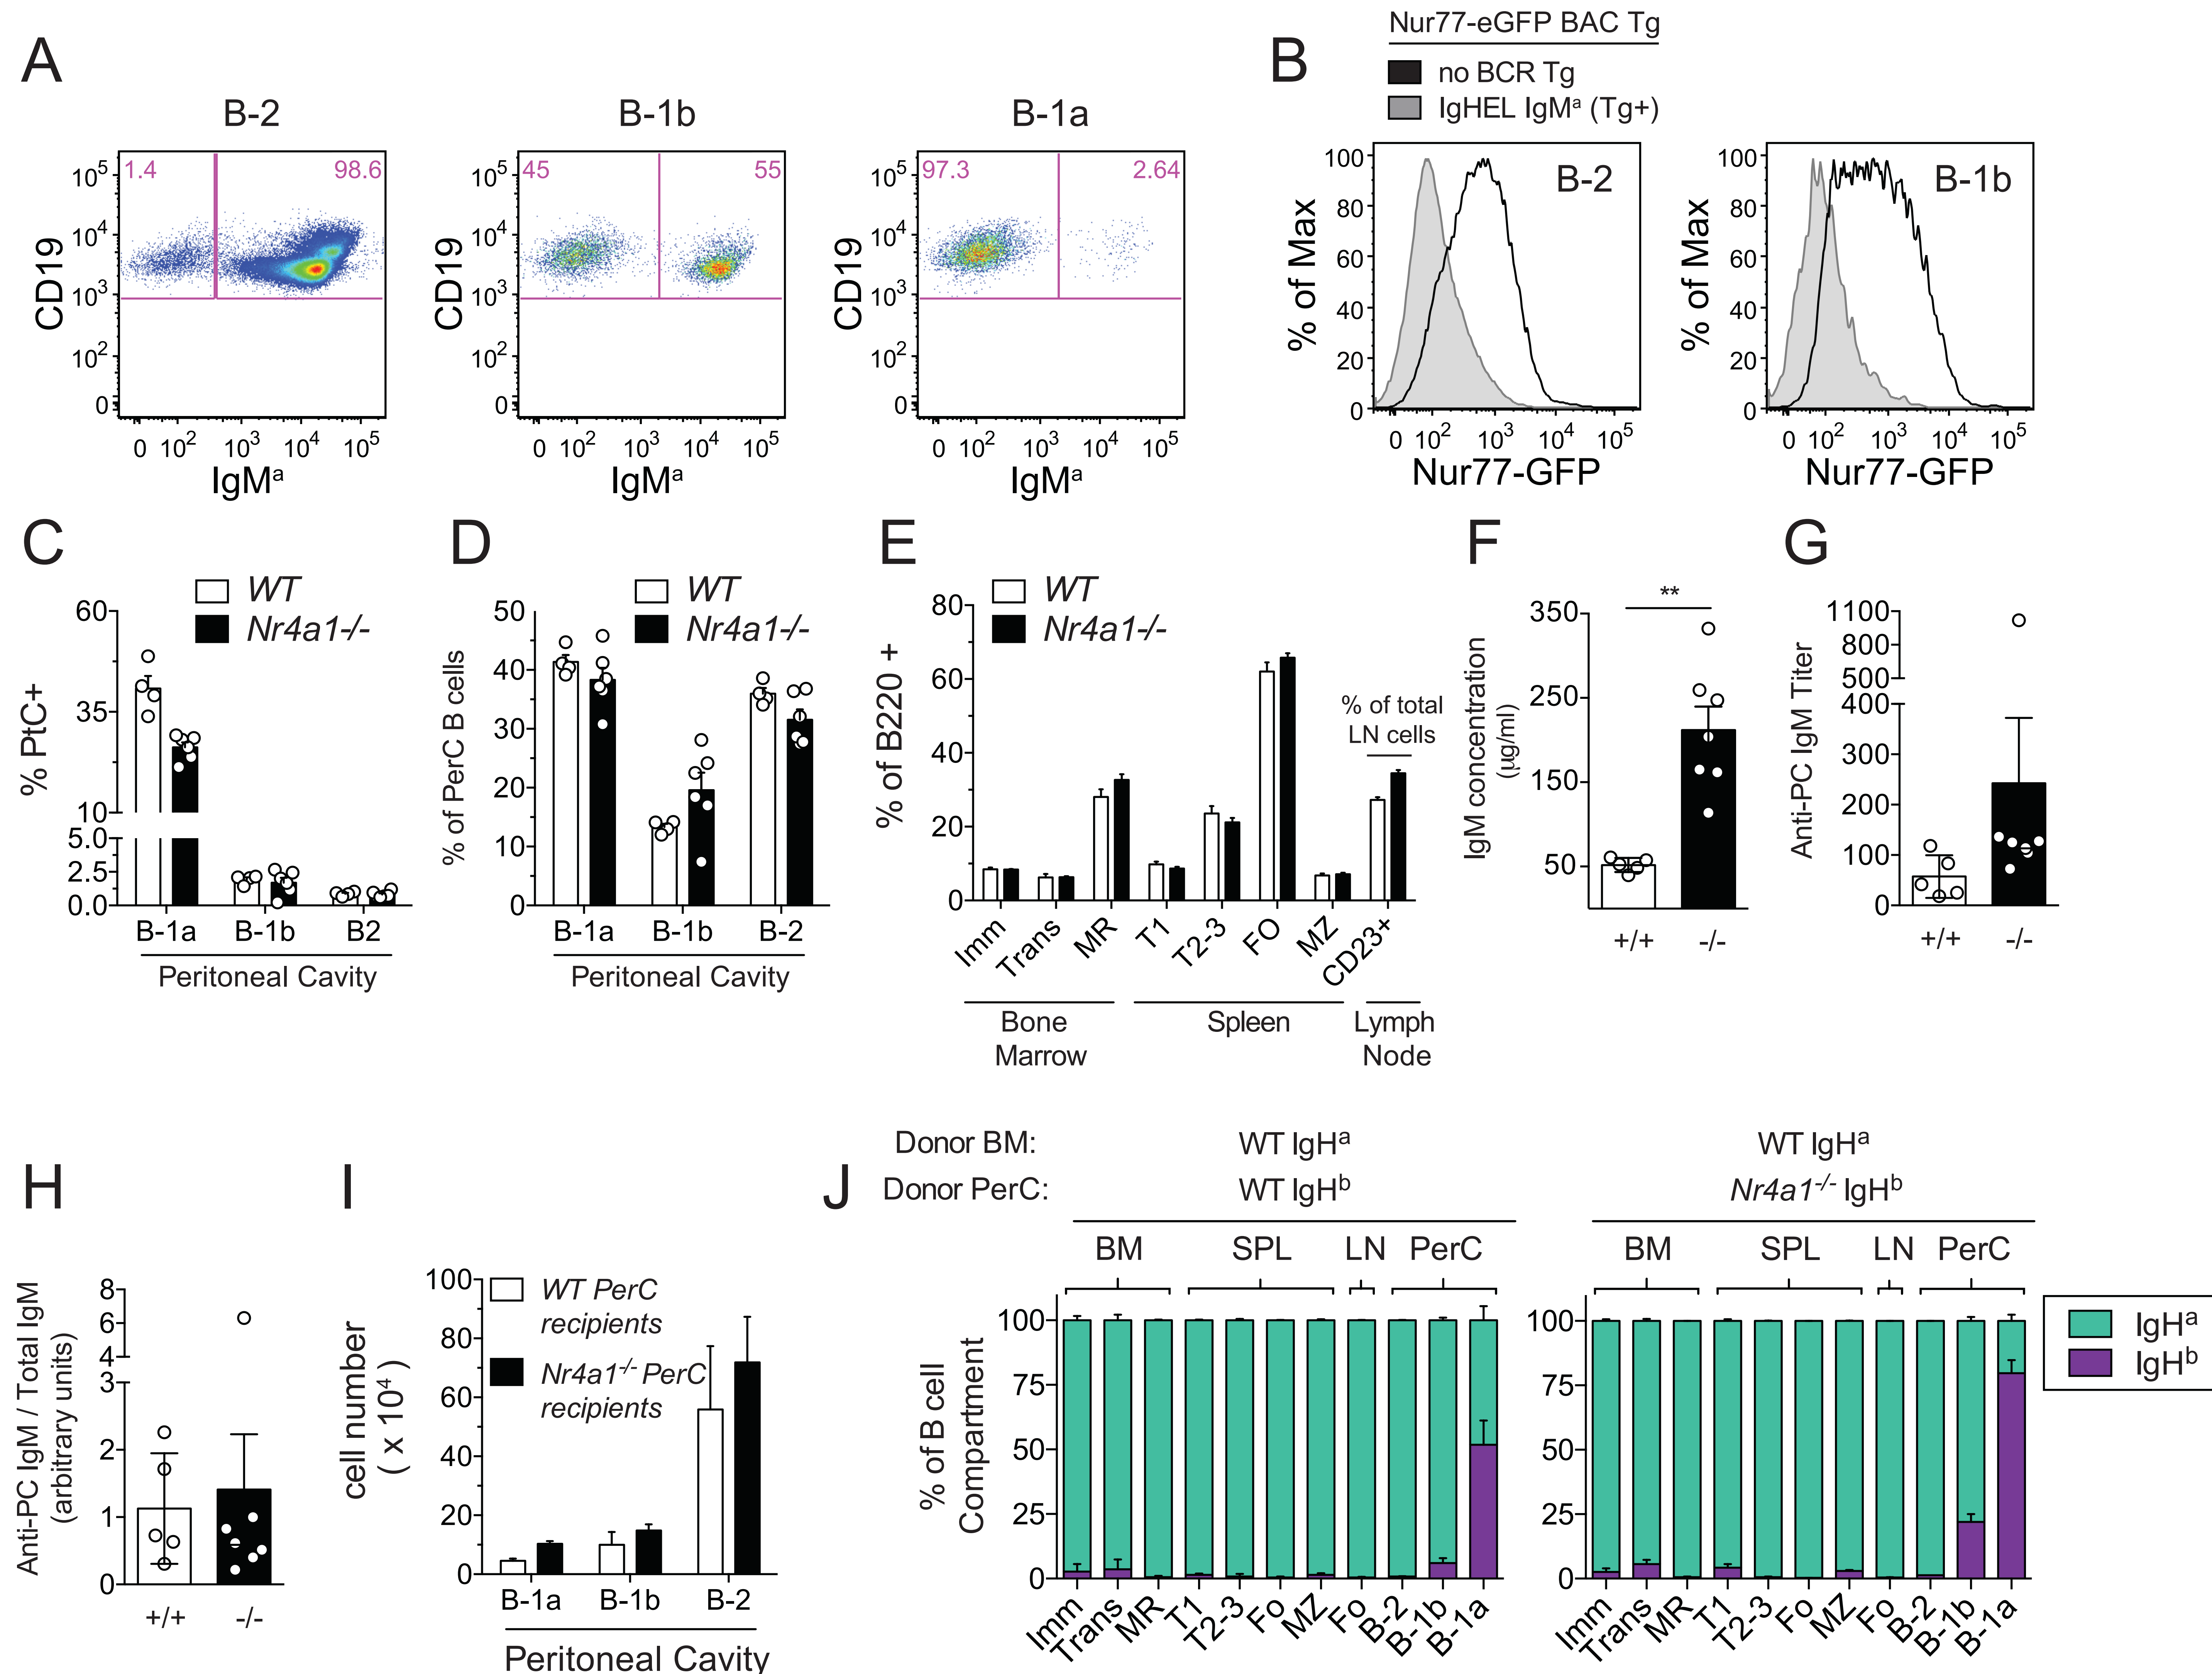

## Supplemental Figure 1.

**(A)** PerC cells from IgHEL BCR Tg Nur77-eGFP reporter mice were stained to identify BCR Tg expression (IgM<sup>a</sup>) in B cell subsets (as gated in 1D). Plots show representative gating to detect Tg+ cells in each B cell compartment. Data are quantified in 1E.

**(B)** Nur77-eGFP mice with or without IgHEL BCR Tg were stained and gated as in 1D, and (A) above. Histograms depict GFP expression in Tg+ and Tg- reporter B cells. Data are quantified in 1F.

**(C)** Graph depicts mean % PtC+ cells (as gated in 2A) among B-1a, B-1b, and B-2 compartments (as gated in 1A) in WT and Nr4a1<sup>-/-</sup> mice +/- SEM.

**(D)** Graph depicts % B-1a, B-1b, and B-2 cells (as gated in 1A) in PerC from WT and Nr4a1<sup>-/-</sup> mice +/- SEM.

**(E)** Graph depicts % B cell subsets in BM, Spleen, and LN of WT and Nr4a1<sup>-/-</sup> mice +/- SEM. CD23<sup>+</sup> LN cells are plotted as % of total LN. Imm = IgM<sup>+</sup>IgD<sup>-</sup>; Trans = IgM<sup>hi</sup>IgD<sup>int</sup>; MR = IgD<sup>hi</sup>IgM<sup>var</sup>; T1 = AA4.1+CD23-CD21<sup>lo</sup>; T2-3 = AA4.1+CD23+CD21<sup>int</sup>; Fo = AA4.1-CD23+CD21<sup>int</sup>; MZ = CD21<sup>hi</sup>CD23<sup>int</sup>.

**(F)** Sera from WT and Nr4a1<sup>-/-</sup> mice were collected at 16 weeks of age and correspond to those analyzed in 3B. Graph shows IgM concentration quantified by ELISA +/- SEM.

**(G)** Sera described in above were quantified for PC-specificity by ELISA. Graph shows mean IgM PC relative concentration +/- SEM.

**(H)** PC-specific IgM titers (as in D) were normalized for individual mice to total IgM (as in C). Graph depicts mean ratio +/- SEM.

**(I, J)** Reconstitution of radiation chimeras generated as in 3C was assessed after 10 weeks. **(I)** Graph depicts absolute cell counts of PerC B cell subsets in recipients of either WT or Nr4a1<sup>-/-</sup> PerC cells +/- SEM for N=4 biological replicates. **(J)** Graph depicts mean % IgM<sup>a</sup> and IgM<sup>b</sup> within each B cell compartment +/- SEM for N=4 biological replicates.

P-values in this figure were calculated using unpaired t-test, with Welch's correction applied to F.



## Supplemental Figure 2

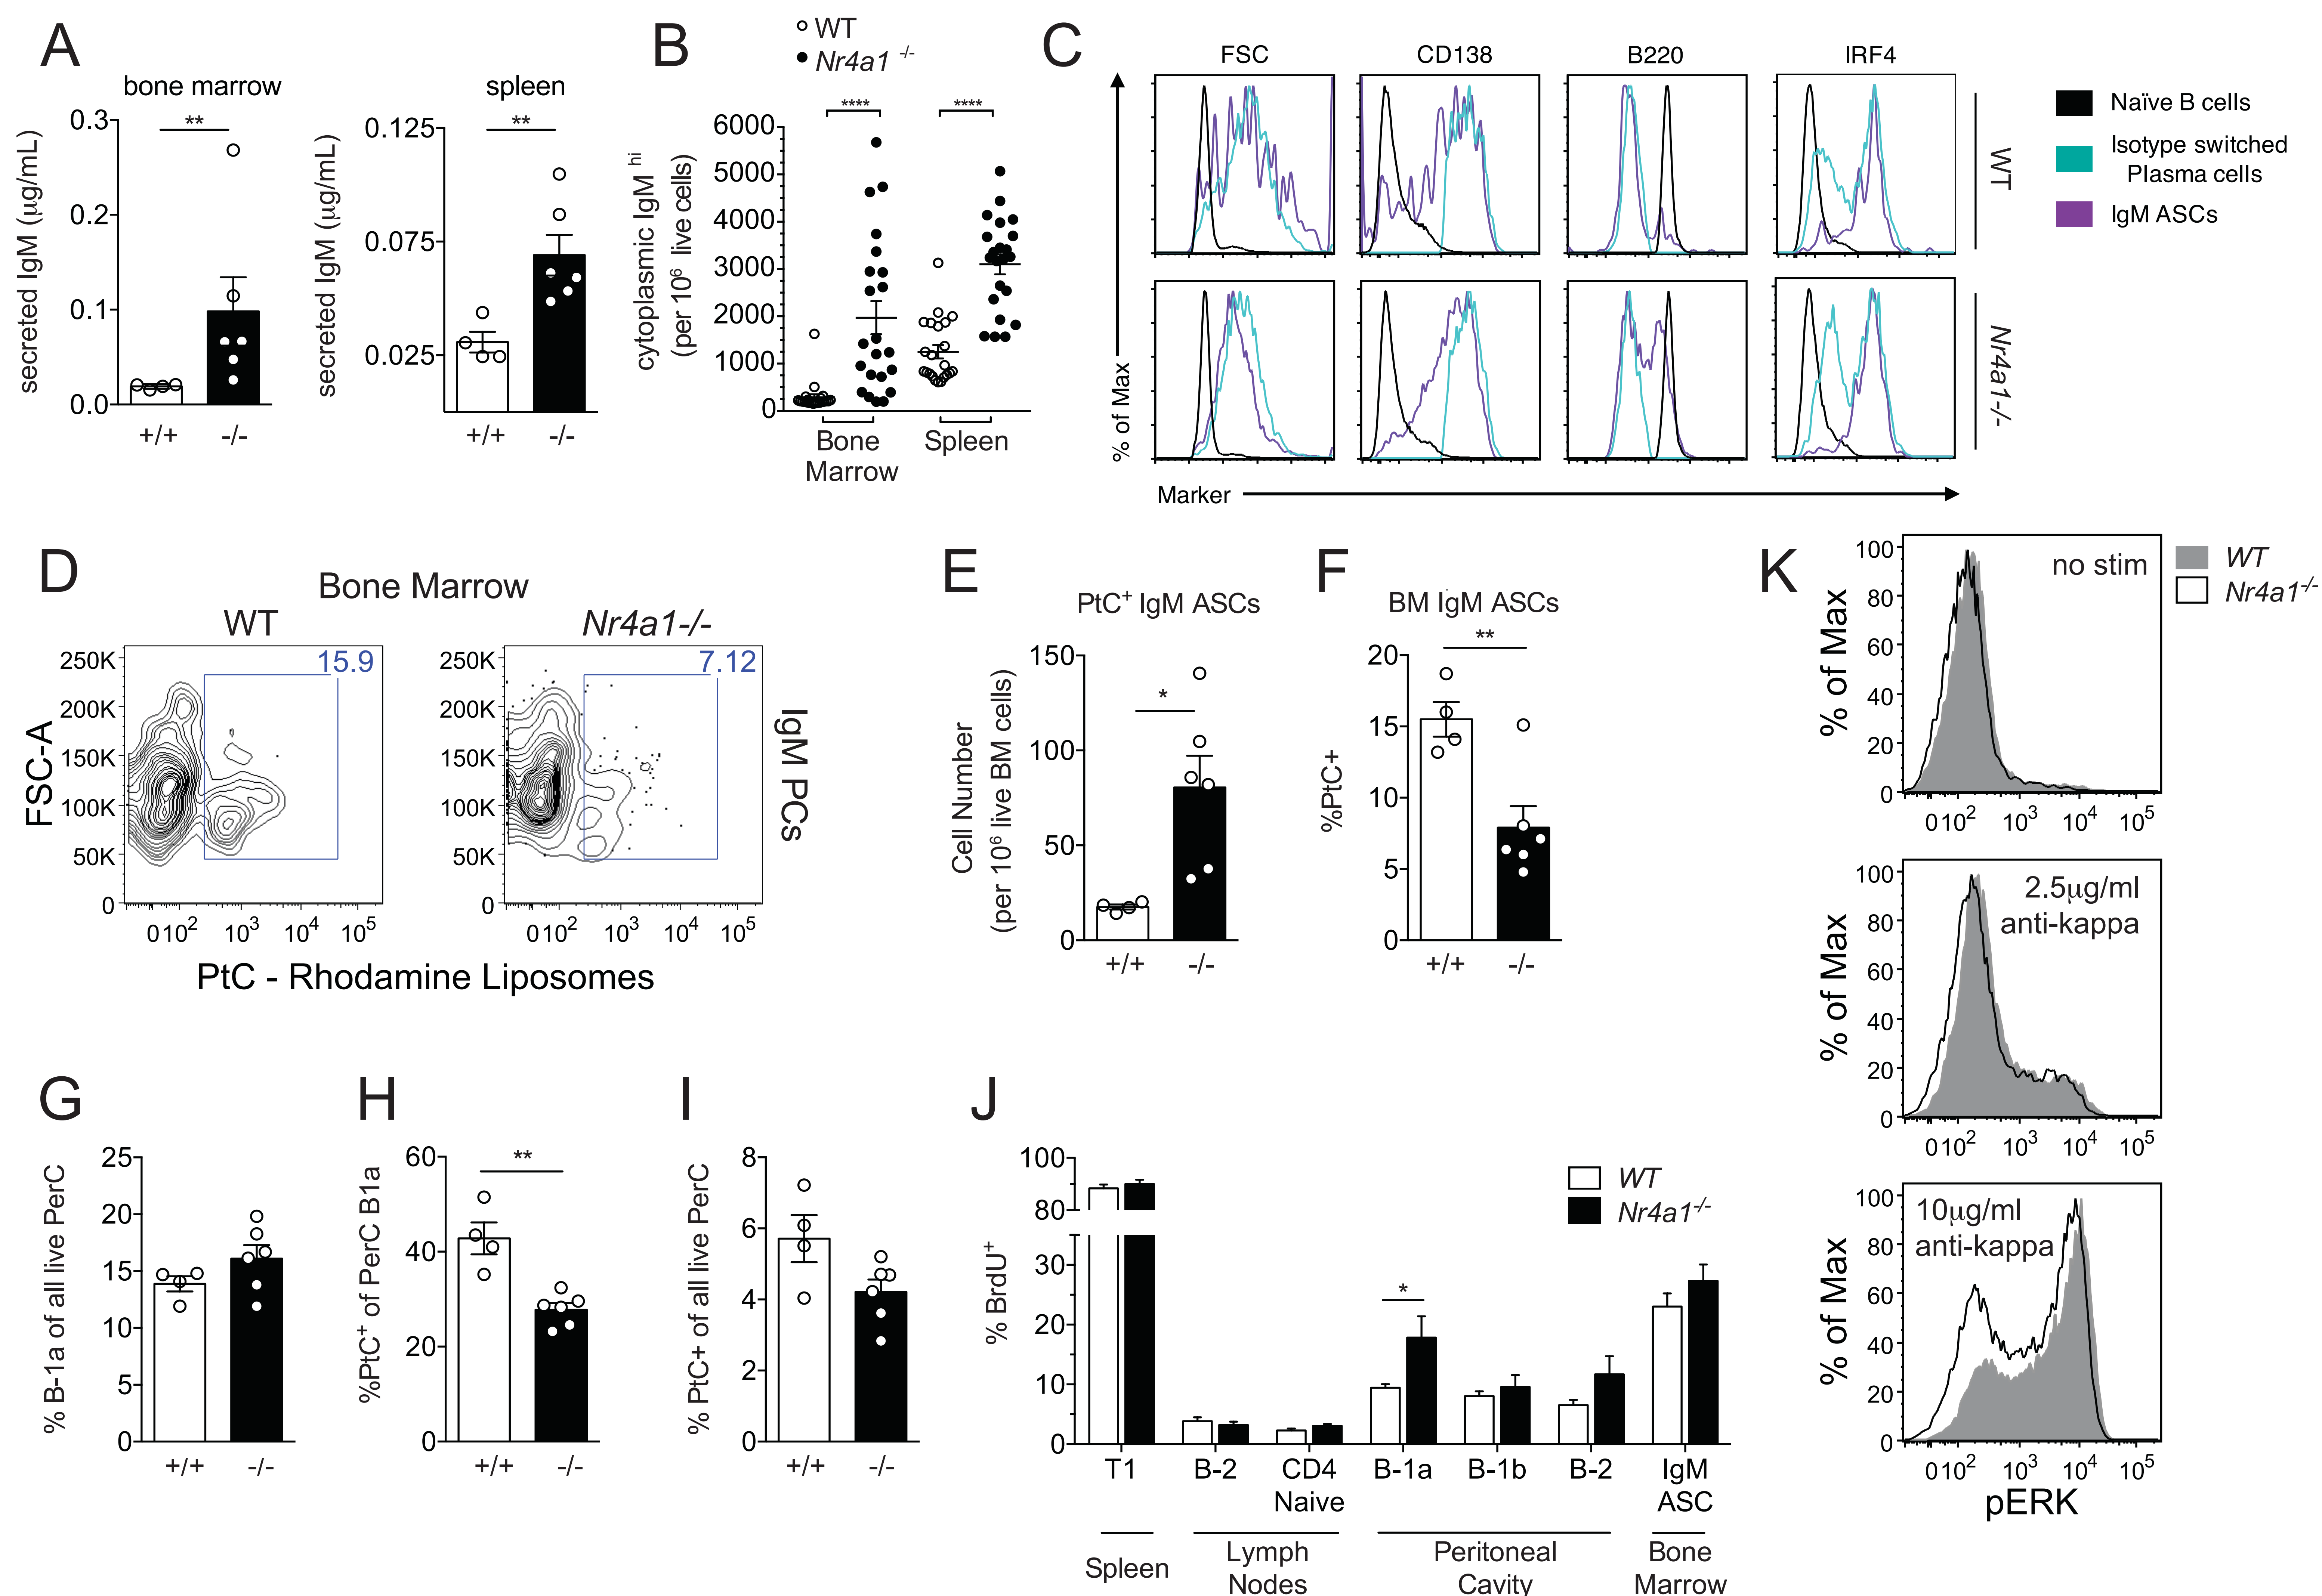

### Supplemental Figure 2.

**(A)** Bone marrow and spleen cells from WT and KO mice were cultured for 24 hours ( $2.5 \times 10^5$  cells/ 200μl) and supernatants were collected. Graphs represent mean IgM concentration assessed by ELISA +/- SEM.

**(B)** Graphs depict mean number of IgM ASCs per  $10^6$  cells +/- SEM from BM and spleen of N=22 WT and KO mice analyzed as gated in 4A.

**(C)** Representative histograms of naïve B cells (B220<sup>hi</sup>, IC-IgM-low), isotype switched PCs (CD138<sup>hi</sup>, IgM-, B220-low), and IgM ASCs (as gated in 4A) from WT and KO mice were overlaid to display FSC, surface CD138 and B220, and intra-cellular Irf4 expression.

**(D)** Bone marrow from WT and KO mice was stained with PtC-liposomes and anti-IgM prior to fixation, followed by intra-cellular IgM. Representative plots gated on IgM ASCs as in 4A gated to identify PtC<sup>+</sup> ASCs. Negative gates set relative to isotype-switched PCs which do not bind PtC.

**(E-I)** Graphs depict mean +/- SEM: (E) number of PtC<sup>+</sup> IgM ASCs (as gated in S2D); (F) % PtC<sup>+</sup> IgM ASCs (as gated in S2D); (G) % B-1a cells in PerC; (H) % PtC<sup>+</sup> cells among B-1a compartment; (I) % PtC<sup>+</sup> cells in PerC.

**(J)** Samples described in 5F were analyzed for BrdU incorporation in lymphocyte subsets. Graph depicts mean % BrdU<sup>+</sup> cells in each subset +/- SEM in N= 5 biological replicates.

**(K)** PerC cells from WT and KO mice were stimulated with varying doses of anti-kappa for 5 minutes, fixed, permeabilized and stained to detect B-1a cells and intra-cellular pErk. Histograms show pErk expression in kappa<sup>+</sup> B-1a cells and are representative of 2 independent experiments.

Data in A, E-I from same N=4 WT and N=6 KO mice and correspond to those analyzed by ELISPOT in 4D, and by FACS in 5A-E. P-values in this figure were calculated using unpaired t-test except Welch's correction applied for B, E. Mann-Whitney test was used for A, B (for non-normal sample distributions).
